# Supplementary material
Source: publisher figshare collection journal article supplement (https://acs.figshare.com/ndownloader/files/8786791)
Supplement: Supplementary file 1 [file 8786791]

## Supporting Information

### Redox Sensitive Nanoscale Coordination Polymers for Drug Delivery and Cancer Theranostics

Jiayue Zhao<sup>1</sup>, Yu Yang<sup>2</sup>, Xiao Han<sup>1</sup>, Chao Liang<sup>1</sup>, Jingjing Liu<sup>1</sup>, Xuejiao Song<sup>1</sup>, Zili Ge<sup>3\*</sup>, and Zhuang Liu<sup>1\*</sup>

1, Institute of Functional Nano & Soft Materials (FUNSOM), Jiangsu Key Laboratory for Carbon-Based Functional Materials & Devices, Soochow University, 199 Ren'ai Road, Suzhou, 215123, Jiangsu, PR China

\*E-mail: zliu@suda.edu.cn

2, State Key Laboratory of Quality Research in Chinese Medicine, Institute of Chinese Medical Sciences, University of Macau, Avenida da Universidade, Taipa, Macau, China

3, Department of Stomatology, The first Affiliated Hospital of Soochow University, Suzhou, China.

\*E-mail: gezl@163.com

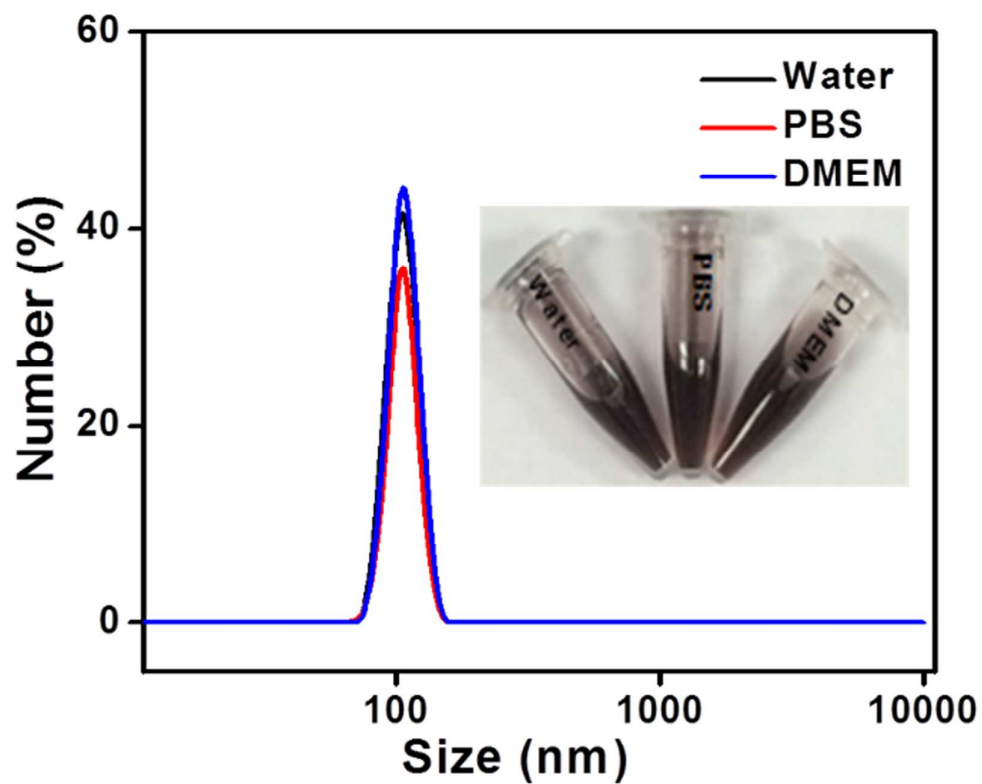

**Supporting Figure S1.** Hydrodynamic diameters of Mn-SS/DOX@PDA-PEG nanoparticles in water, phosphate buffered saline (PBS), and DMEM cell culture medium. Inset is a photo of Mn-SS/DOX@PDA-PEG solution in water, PBS, and DMEM.
